# Supplementary material for: Significant expansion of the REST/NRSF cistrome in human versus mouse embryonic stem cells: potential implications for neural development
Source: PubMed Central journal article supplement (PMC4499139; doi:10.1093/nar/gkv514), 2015-05-18
Supplement: supp_gkv514_nar-00580-h-2015-File008.pdf [file supp_gkv514_nar-00580-h-2015-File008.pdf]

## **Significant Expansion of the REST/NRSF Cistrome in Human versus Mouse Embryonic Stem Cells: Potential Implications for Neural Development**

Shira Rockowitz <sup>1</sup>, Deyou Zheng <sup>1,2,3,\*</sup>

1. *Department of Genetics, Albert Einstein College of Medicine, Bronx, NY 10461, U.S.A.*
2. *Department of Neurology, Albert Einstein College of Medicine, Bronx, NY 10461, U.S.A.*
3. *Department of Neuroscience, Albert Einstein College of Medicine, Bronx, NY 10461, U.S.A.*

\*To whom correspondence should be addressed.

Tel: +1 718 839 7215

Fax: +1 718 430 8785

Email: [deyou.zheng@einstein.yu.edu](mailto:deyou.zheng@einstein.yu.edu)

**SUPPLEMENTARY DATA**

## Supplemental Figures

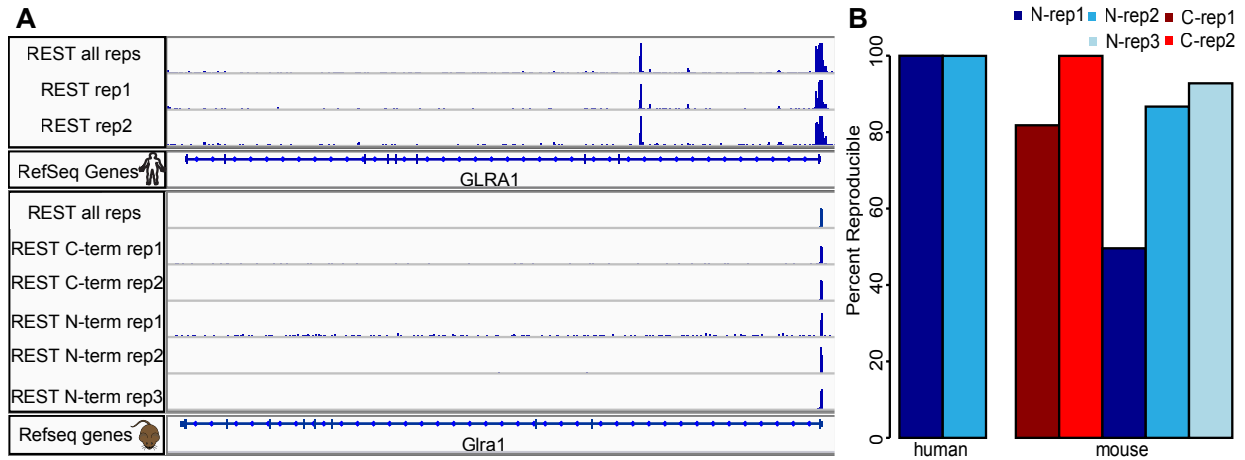

**Figure S1. Reproducibility of REST binding across replicates.** (A) Pileup of REST ChIP-seq reads across replicate REST ChIP-seq samples in hESCs and mESCs at *GLRA1/Glra1*. The top track is from pooled data and the bottoms are individual experiments. (B) Percentage of final peaks that was also called in each of the ChIP-seq replicate samples. “N” and “C” replicates (reps) indicate data from antibodies recognizing N- or C-terminal domain of REST protein, respectively.

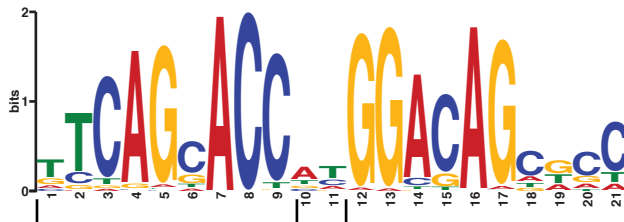

**Figure S2. RE1 motif identified in all hESC ChIP-seq peaks.** Lines demarcate left and right half sites of the motif.

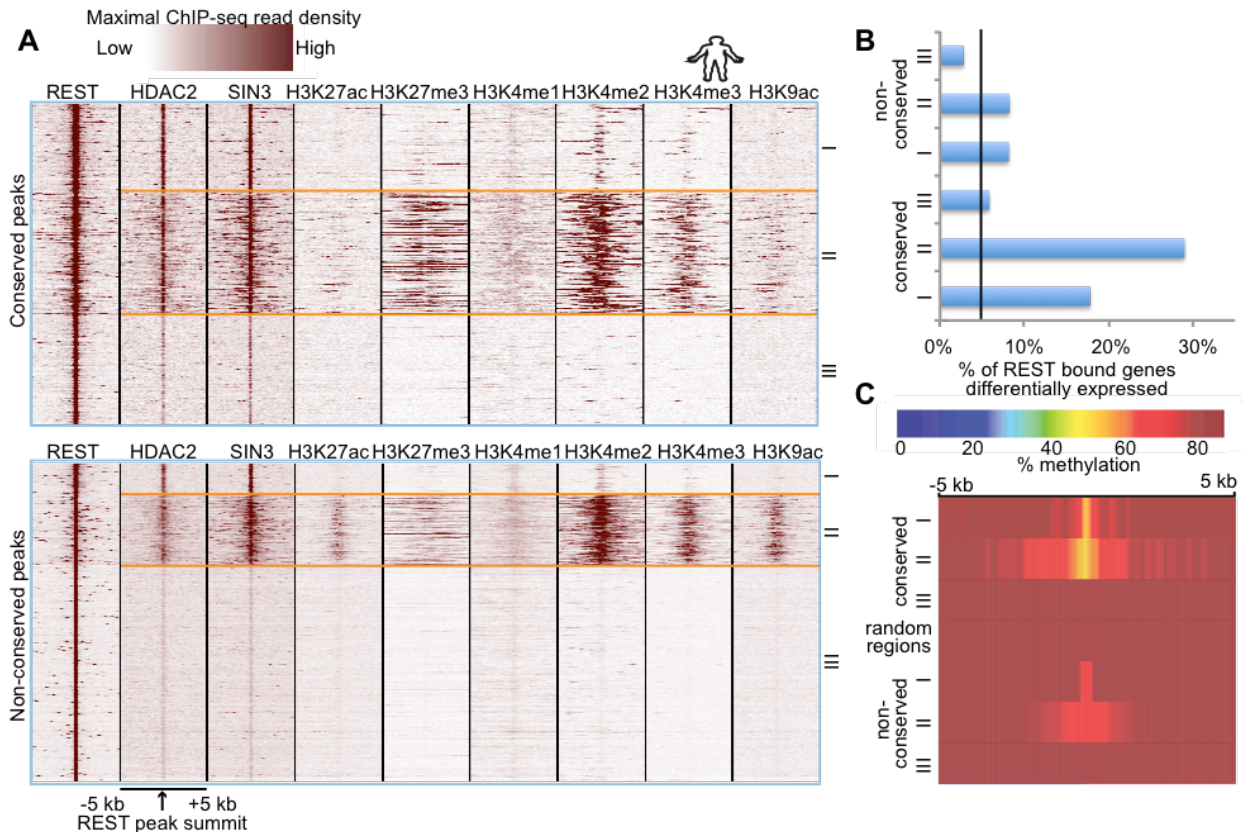

**Figure S3. Human REST cistrome association with DNA hypomethylation and differential gene expression.** (A) Heatmaps of maximal read coverages in 50 bp bins from -5 kb to 5kb of the hESC REST peak summits at conserved (top) and non-conserved (bottom) REST peaks. (B) Percentages of genes up-regulated in hESCs upon REST KD. The differential expression for human genes was compiled from REST KD in non-ESCs as no REST KD/KO expression data were available from hESCs for the current analysis. For human data we compiled a list of upregulated genes from four REST KD experiments: two HEK293 (80, 81), an MCF10a (81) and an T47D (81) experiment. See Table S7 for a complete list of upregulated genes across all human and mouse REST KD/KO experiments. The black line marks % of up-regulated genes at the genome-wide level. (C) Profiles of CpG methylation percentage at REST peaks and flanking regions.

|     |    |    |     |     |     |    |    |    |     |    |
|-----|----|----|-----|-----|-----|----|----|----|-----|----|
| ALS | 19 |    |     |     |     |    |    |    |     |    |
| ASD | 0  | 91 |     |     |     |    |    |    |     |    |
| AZ  | 1  | 5  | 178 |     |     |    |    |    |     |    |
| HD  | 1  | 1  | 12  | 155 |     |    |    |    |     |    |
| HKG | 4  | 1  | 5   | 13  | 566 |    |    |    |     |    |
| ID  | 0  | 3  | 3   | 2   | 2   | 36 |    |    |     |    |
| ND  | 2  | 0  | 4   | 4   | 3   | 0  | 53 |    |     |    |
| OS  | 0  | 0  | 10  | 5   | 3   | 0  | 1  | 60 |     |    |
| PD  | 0  | 2  | 11  | 3   | 15  | 0  | 3  | 8  | 106 |    |
| SZ  | 1  | 0  | 2   | 2   | 3   | 1  | 1  | 0  | 0   | 49 |
| ALS |    |    |     |     |     |    |    |    |     |    |
| ASD |    |    |     |     |     |    |    |    |     |    |
| AZ  |    |    |     |     |     |    |    |    |     |    |
| HD  |    |    |     |     |     |    |    |    |     |    |
| HKG |    |    |     |     |     |    |    |    |     |    |
| ID  |    |    |     |     |     |    |    |    |     |    |
| ND  |    |    |     |     |     |    |    |    |     |    |
| OS  |    |    |     |     |     |    |    |    |     |    |
| PD  |    |    |     |     |     |    |    |    |     |    |
| SZ  |    |    |     |     |     |    |    |    |     |    |

**Figure S4. Overlap of gene sets used for disease-associated analysis.**

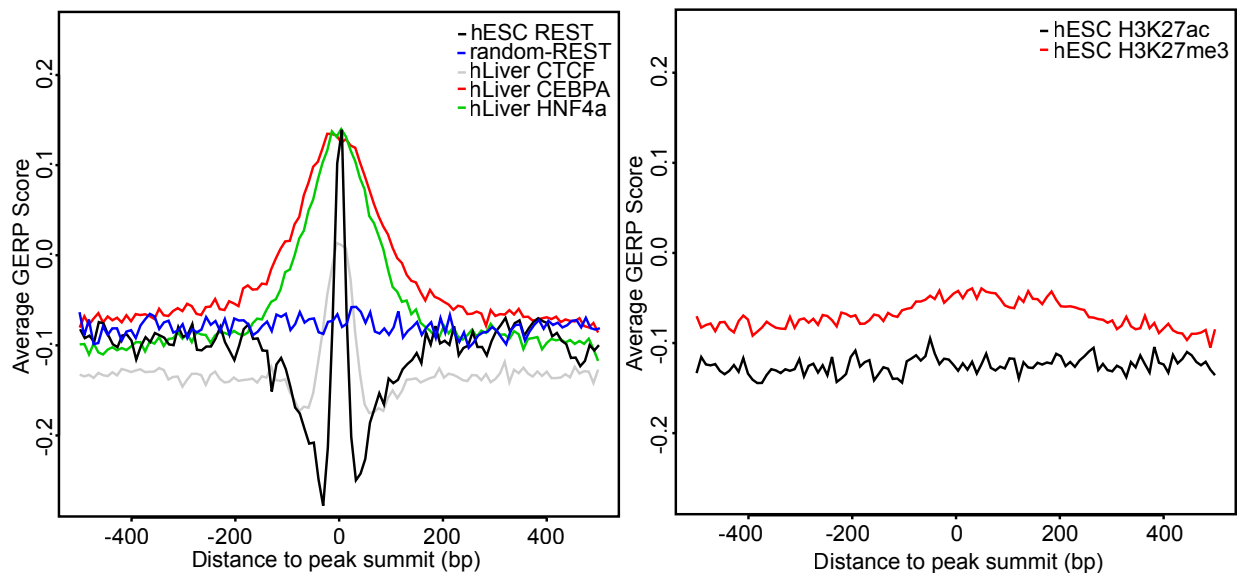

**Figure S5. GERP scores at regions bound by selected TFs and or enriched with selected HMs.** Y-axis shows the averaged GERP score from GERP++ base-wise scores (46) averaged over all peaks, from -500 bp to 500 bp of the peak summits. The HNF4 $\alpha$ , CEBPA, and CTCF peaks were called from human liver ChIP-seq data, while the histone modifications were from hESCs.

**Supplemental Tables**

**Table S1. List of accession numbers and total reads of the CHIP-seq and expression datasets.**

See separate Excel file.

**Table S2. List of all REST peaks identified in hESCs and mESCs, their relationship to genes, and their conservation. See separate Excel file.**

**Table S3. % of human and mouse, conserved and non-conserved REST peaks with RE1 motifs.**

|                   | human<br>all | human<br>conserved | human<br>non-<br>conserved | mouse<br>all | mouse<br>conserved | mouse<br>non-<br>conserved |
|-------------------|--------------|--------------------|----------------------------|--------------|--------------------|----------------------------|
| <b>cRE1</b>       | 58.4%        | 81.4%              | 53.4%                      | 66.6%        | 80.9%              | 61.2%                      |
| <b>ncRE1</b>      | 3.4%         | 5.4%               | 2.9%                       | 4.0%         | 6.3%               | 2.9%                       |
| <b>half site</b>  | 33.6%        | 12.9%              | 37.8%                      | 28.4%        | 12.7%              | 34.7%                      |
| <b>noRE1</b>      | 4.7%         | 0.3%               | 5.9%                       | 0.9%         | 0.1%               | 1.3%                       |
| <b>promoter</b>   | 15.6%        | 28.7%              | 13.3%                      | 18.4%        | 30.0%              | 13.3%                      |
| <b>exon</b>       | 5.9%         | 9.0%               | 5.4%                       | 7.4%         | 7.5%               | 7.4%                       |
| <b>intron</b>     | 37.1%        | 32.4%              | 37.9%                      | 35.0%        | 31.3%              | 36.6%                      |
| <b>distal</b>     | 20.6%        | 16.9%              | 21.3%                      | 23.0%        | 17.3%              | 25.5%                      |
| <b>intergenic</b> | 20.7%        | 13.1%              | 22.1%                      | 16.2%        | 14.0%              | 17.2%                      |

**Table S4. Numbers and percentages of alignable and conserved peaks by different methods.**

See separate Excel file.

**Table S5. Percentages and Enrichments REST peaks colocalized with TFs and HMs.**

|  | Percent of<br>REST<br>peaks with<br>TF/HM,<br>human | Fold<br>Enrichment<br>over<br>random<br>regions, | Percent of<br>REST<br>peaks with<br>TF/HM,<br>mouse | Fold<br>Enrichment<br>over<br>random<br>regions, |
|--|-----------------------------------------------------|--------------------------------------------------|-----------------------------------------------------|--------------------------------------------------|
|  |                                                     |                                                  |                                                     |                                                  |

|                 |                       | human |       | mouse  |
|-----------------|-----------------------|-------|-------|--------|
|                 | Transcription Factors |       |       |        |
| <b>COREST</b>   | N/A                   | N/A   | 3.4%  | 69.00  |
| <b>LSD1</b>     | N/A                   | N/A   | 4.7%  | 32.50  |
| <b>KDM5B</b>    | 0.1%                  | 0.00  | 0.7%  | 14.50  |
| <b>SUZ12</b>    | 0.3%                  | 3.14  | 0.9%  | 8.75   |
| <b>HDAC6</b>    | 6.8%                  | 3.91  | N/A   | N/A    |
| <b>EZH2</b>     | 0.6%                  | 4.18  | 0.6%  | 12.00  |
| <b>SOX2</b>     | 2.6%                  | 4.91  | 2.4%  | 7.14   |
| <b>KLF4</b>     | 0.2%                  | 7.50  | 5.8%  | 0.00   |
| <b>CTCF</b>     | 6.5%                  | 10.82 | 5.2%  | 21.50  |
| <b>POL2</b>     | 4.0%                  | 12.04 | 1.5%  | 15.50  |
| <b>TAF1</b>     | 4.5%                  | 13.81 | 0.2%  | 3.33   |
| <b>MYC</b>      | 0.9%                  | 18.75 | 0.4%  | 0.00   |
| <b>OCT4</b>     | 0.5%                  | 19.00 | 2.0%  | 11.57  |
| <b>BRG1</b>     | 7.9%                  | 25.04 | 0.5%  | 7.00   |
| <b>NANOG</b>    | 0.7%                  | 61.00 | 2.6%  | 7.07   |
| <b>HDAC1</b>    | N/A                   | N/A   | 20.7% | 9.24   |
| <b>P300</b>     | 2.0%                  | 18.67 | 10.1% | 14.75  |
| <b>HDAC2</b>    | 31.3%                 | 6.65  | 31.8% | 6.69   |
| <b>SIN3</b>     | 19.3%                 | 83.21 | 12.6% | 258.00 |
|                 | Histone Modifications |       |       |        |
| <b>H3K9me3</b>  | 3.6%                  | 0.57  | 5.8%  | 0.93   |
| <b>H3K36me3</b> | 5.0%                  | 0.71  | 11.9% | 1.26   |
| <b>H2A.Z</b>    | 18.2%                 | 2.23  | 3.3%  | 1.80   |
| <b>H3K4me1</b>  | 33.2%                 | 3.37  | 37.5% | 2.82   |
| <b>H3K27ac</b>  | 13.9%                 | 3.39  | 14.8% | 2.67   |
| <b>H3K9ac</b>   | 15.4%                 | 4.36  | 24.4% | 3.25   |
| <b>H3K27me3</b> | 15.3%                 | 4.61  | 14.2% | 3.21   |
| <b>H3K4me2</b>  | 26.2%                 | 4.80  | 30.7% | 4.70   |
| <b>H3K4me3</b>  | 19.0%                 | 5.85  | 22.2% | 6.16   |

**Table S6. Numbers and percentages of REST peaks in the three types.**

|                            | Number of peaks |         |          | Percent |         |          |
|----------------------------|-----------------|---------|----------|---------|---------|----------|
|                            | type I          | type II | type III | type I  | type II | type III |
| <b>human all</b>           | 1,047           | 1,974   | 5,178    | 12.8%   | 24.1%   | 63.2%    |
| <b>human conserved</b>     | 345             | 483     | 424      | 27.6%   | 38.6%   | 33.9%    |
| <b>human non-conserved</b> | 549             | 1,320   | 3,906    | 9.5%    | 22.9%   | 67.6%    |
| <b>mouse all</b>           | 521             | 1,170   | 2,416    | 12.7%   | 28.5%   | 58.8%    |
| <b>mouse conserved</b>     | 348             | 479     | 420      | 27.9%   | 38.4%   | 33.7%    |
| <b>mouse non-conserved</b> | 108             | 574     | 1,688    | 4.6%    | 24.2%   | 71.2%    |

**Table S7. List of all mouse and human upregulated genes in REST depletion and the citations.**

See separate Excel file.

**Table S8. List of all disease associated genes and the data sources.**

See separate Excel file.

**Table S9. List of disease associated genes with a peak in both and human-specific REST peak.**

| <b>Diseases/<br/>Pathways</b> | <b>Peak in both species</b>                                                                                                                   | <b>Human specific peak</b>                                                                                                                                                                                                                                                                                                                                                         |
|-------------------------------|-----------------------------------------------------------------------------------------------------------------------------------------------|------------------------------------------------------------------------------------------------------------------------------------------------------------------------------------------------------------------------------------------------------------------------------------------------------------------------------------------------------------------------------------|
| <b>AD</b>                     | ACTA1,APBA2,CACNA1D,CACNB4,CHRM2,CHRM4,CTNNA2,FZD4,KLC1,LEF1,MAPK10,MAPK11,MMP24,PCSK1,PCSK2,PRKCB,PRKCE,PRKCG,PRKCZ,PVRL1,TCF7L1,TRPC7,WNT2B | ACTG2,ADAM10,APBB1,APP,CACNA1C,CACNB2,CHRM1,CHRM3,DVL3,ERBB4,ERN2,GSK3B,LRP1B,LRP2,LRP5,LRP6,MAPK14,MAPK8,MAPKAPK2,MLLT4,MMP23B,NCSTN,NOTCH1,PCSK6,PKN3,PRKCA,PRKCD,PSEN2,TCF7L2,TRIM2,WNT3,WNT4,WNT7A,WNT8A                                                                                                                                                                       |
| <b>ALS</b>                    | NEFH                                                                                                                                          | ALS2,ERBB4,FUS,SETX,VAPB                                                                                                                                                                                                                                                                                                                                                           |
| <b>ASD</b>                    | ADCYAP1,AGAP1,AUTS2,CUX1,DCX,DLX5,GLRA1,GLRA2,GLRA3,GRM8,KCNN3,NRCAM,NRXN1,OMG,PRKCB,RELN,REST,SLC6A11                                        | ADAM23,ADRA2A,CACNA1C,CADPS2,DDCFYN,GABRB1,GABRG1,GABRR2,GRPR,ID2,LARGE,LRRN3,MBP,NCAM1,NLGN4X,PEPK,PTEN,SCN2B,SLC1A6,SLC6A1,SYPL1,TSC1                                                                                                                                                                                                                                            |
| <b>HD</b>                     | ACTA1,BDNF,DLG4,DNAH7,DYNLL2,GRIK2,GRIK3,GRIK4,GRIN1,GRIN2A,GRIN2C,GRIN3A,KALRN,MAPK10,MAP3K9,TAF4,TP73,TUBB3,VAT1L                           | ACTG2,AP2A2,ARL4C,ARPC5L,CAPN13,CREBBP,DNAH17,DNAH5,DNAH6,DNAH9,DYNC111,DYNC2H1,EP300,FOS,GRIN2B,GRIN2D,HTT,MAP3K11,MAPK8,RHOJ,TP63,TUBB2A,TUBB6                                                                                                                                                                                                                                   |
| <b>HKG</b>                    | AP2S1,CALM1,ELAVL3,EXTL3,GABARAPL2,GRM4,ID3,KIFC3,LMO1,LTBP4,MAPK8IP1,PSMB2,RPL11,RPL17,RPL38,RPLP1,SRM,TACC1,YWHAQ                           | ADAM15,ARHGEF7,ATF4,CALM2,CENPB,CIT1,CIZ1,CNTN1,COL6A1,COPE,COX7A2L,DAXX,EIF4A2,ENTPD6,FUS,GM2A,GNAI2,GP2,H2AFY,H6PD,HADHA,HLA-C,HPCAL1,HSBP1,JAK1,LDHA,LGALS9,MAP3K11,MAPKAPK2,MC2R,MIF,MYH9,NCL,NUDT3,NXF1,PFDN1,PGK1,PHGDH,PLXNB2,POLR2A,POLR2L,PSMA7,PSMB7,PTDSS1,PTMA,RPL10,RPL32,RPS14,RPS16,RPS2,SDC3,SLC25A3,SLC6A7,SPAG7,ST5,TAGLN,TALDO1,TCOF1,TIMM44,TKT,UQCRC1,ZFP36L1 |
| <b>ID</b>                     | CTNND2                                                                                                                                        | CLN8,IL1RAPL1,PDHX                                                                                                                                                                                                                                                                                                                                                                 |
| <b>ND</b>                     | APLP1,BDNF,BSN,CDK5R2,ESR1,FGF14,NEFH,PRKCG,SLC1A1,SYP,WFS1                                                                                   | BCHE,BCL2,BCL2L1,CASP7,CDK5,CDK5R1,FGF2,GRB2,INSR,SGK1                                                                                                                                                                                                                                                                                                                             |
| <b>OS</b>                     | MAPK10,MAPK11                                                                                                                                 | BCL2,DUSP4,DUSP6,DUSP7,MAP2K6,MAP3K4,MAPK14,MAPK8,MAPKAPK2,MAX,STAT1,STYX                                                                                                                                                                                                                                                                                                          |
| <b>PD</b>                     | ATP1A3,DBH,FBXW11,MAPK10,MAPK11,PARK2,SRC,TOR2A,TPH2,TTBK1,YWHAQ                                                                              | BTRC,FRK,FYN,MAPK14,MAPK8,PARK7,PLD2,PSMA7,PSMB7,SEPT4,SLC6A3,SNCAIP,TTBK2                                                                                                                                                                                                                                                                                                         |
| <b>SZ</b>                     | ANKHD1,DAO,DRD3,NPAS3,NRG1,PPP3CA,RTN4R,SPTBN4,SYN2                                                                                           | APOL2,ATF4,CCDC141,DISC1,ERBB4,PDE4B,PDLIM5,PLXNA2,PPP1R1B,SYNE1,TNF                                                                                                                                                                                                                                                                                                               |
